# Supplementary material for: Effect of a Four-Week Vegan Diet on Performance, Training Efficiency and Blood Biochemical Indices in CrossFit-Trained Participants
Source: MDPI journal article supplement (doi:10.3390/nu14040894), 2022-02-20
Supplement: s1 [file s1]

Table S3. The results of the HIFT training units during the 4-week nutritional interventions period

| TRENING                      | Group            | Exercises duration (s)<br>$\bar{X} \pm \text{SD}$ (95% CI) | Number of series<br>$\bar{X} \pm \text{SD}$ (95% CI) |
|------------------------------|------------------|------------------------------------------------------------|------------------------------------------------------|
| A1                           | Veg <sup>D</sup> | 1181.7 $\pm$ 11.5<br>(1173.5 - 1189.9)                     | 8.8 $\pm$ 1.4<br>(7.8 - 9.8)                         |
|                              | Mix <sup>D</sup> | 1173.6 $\pm$ 35.1<br>(1148.5 - 1198.7)                     | 8.3 $\pm$ 1.8<br>(7.0 - 9.6)                         |
|                              | <i>p</i> -value  | 0.850                                                      | 0.492                                                |
| A2                           | Veg <sup>D</sup> | 1172 $\pm$ 19.6<br>(1158.0 - 1186.0)                       | 9.0 $\pm$ 1.4<br>(8.0 - 10.0)                        |
|                              | Mix <sup>D</sup> | 1175.2 $\pm$ 15.0<br>(1164.5 - 1185.9)                     | 8.3 $\pm$ 1.2<br>(7.5 - 9.1)                         |
|                              | <i>p</i> -value  | 0.687                                                      | 0.364                                                |
| Veg <sup>D</sup> (A1 vs. A2) | <i>p</i> -value  | 0.171                                                      | 0.361                                                |
| Mix <sup>D</sup> (A1 vs. A2) | <i>p</i> -value  | 0.333                                                      | 1.000                                                |
| B                            | Veg <sup>D</sup> | 1361.1 $\pm$ 249.9<br>(1182.3 - 1539.9)                    | -                                                    |
|                              | Mix <sup>D</sup> | 1392.4 $\pm$ 283.2<br>(1189.8 - 1595.0)                    | -                                                    |
|                              | <i>p</i> -value  | 0.821                                                      | -                                                    |
| C1                           | Veg <sup>D</sup> | 1167.7 $\pm$ 36.5<br>(1141.6 - 1193.8)                     | 8.9 $\pm$ 1.0<br>(8.2 - 9.6)                         |
|                              | Mix <sup>D</sup> | 1176.6 $\pm$ 26.1<br>(1156.5 - 1196.6)                     | 8.6 $\pm$ 0.9<br>(7.9 - 9.2)                         |
|                              | <i>p</i> -value  | 0.775                                                      | 0.438                                                |
| C2                           | Veg <sup>D</sup> | 1158.1 $\pm$ 36.3<br>(1132.2 - 1184.0)                     | 9.0 $\pm$ 1.1<br>(8.2 - 9.8)                         |
|                              | Mix <sup>D</sup> | 1152.2 $\pm$ 42.4<br>(1121.8 - 1182.6)                     | 8.8 $\pm$ 0.9<br>(8.1 - 9.5)                         |
|                              | <i>p</i> -value  | 0.742                                                      | 0.623                                                |
| C3                           | Veg <sup>D</sup> | 1138.4 $\pm$ 22.9<br>(1122.0 - 1154.8)                     | 9.4 $\pm$ 0.8<br>(8.8 - 10.0)                        |
|                              | Mix <sup>D</sup> | 1169.0 $\pm$ 26.0<br>(1150.4 - 1187.6)                     | 9.3 $\pm$ 0.8<br>(8.7 - 9.9)                         |
|                              | <i>p</i> -value  | <b>0.012</b>                                               | 0.791                                                |
| C4                           | Veg <sup>D</sup> | 1160.8 $\pm$ 25.3<br>(1139.6 - 1181.9)                     | 9.6 $\pm$ 0.7<br>(9.0 - 10.2)                        |
|                              | Mix <sup>D</sup> | 1154.2 $\pm$ 35.5<br>(1128.8 - 1179.6)                     | 9.5 $\pm$ 0.8<br>(8.9 - 10.1)                        |
|                              | <i>p</i> -value  | 0.666                                                      | 0.859                                                |
| C5                           | Veg <sup>D</sup> | 1155.0 $\pm$ 21.1<br>(1139.9 - 1170.1)                     | 10.1 $\pm$ 0.9<br>(9.5 - 10.7)                       |
|                              | Mix <sup>D</sup> | 1151.4 $\pm$ 30.8<br>(1129.4 - 1173.4)                     | 9.6 $\pm$ 1.2<br>(8.8 - 10.4)                        |
|                              | <i>p</i> -value  | 0.764                                                      | 0.257                                                |
| C6                           | Veg <sup>D</sup> | 1159.8 $\pm$ 26.6<br>(1140.8 - 1178.8)                     | 10.0 $\pm$ 0.7<br>(9.5 - 10.5)                       |

|                          |                  |                                     |                              |
|--------------------------|------------------|-------------------------------------|------------------------------|
|                          | Mix <sub>D</sub> | 1167.6 ± 20.6<br>(1152.9 - 1182.3)  | 10.1 ± 0.9<br>(9.5 - 10.7)   |
|                          | <i>p</i> -value  | 0.473                               | 0.970                        |
| Veg <sub>D</sub> (C1-C6) |                  | 0.369                               | <b>&lt;0.001<sup>a</sup></b> |
| Mix <sub>D</sub> (C1-C6) | <i>p</i> -value  | 0.340                               | <b>&lt;0.001<sup>b</sup></b> |
|                          | Veg <sub>D</sub> | 1313.2 ± 178.0<br>(1176.4 - 1450.0) | -                            |
| D1                       | Mix <sub>D</sub> | 1289.0 ± 216.5<br>(1134.1 - 1443.9) | -                            |
|                          | <i>p</i> -value  | 0.795                               | -                            |
|                          | Veg <sub>D</sub> | 1197.9 ± 222.7<br>(1038.6 - 1357.2) | -                            |
| D2                       | Mix <sub>D</sub> | 1253.2 ± 248.1<br>(1075.7 - 1430.7) | -                            |
|                          | <i>p</i> -value  | 0.606                               | -                            |
|                          | Veg <sub>D</sub> | 1107.1 ± 215.3<br>(953.1 - 1261.1)  | -                            |
| D3                       | Mix <sub>D</sub> | 1148.7 ± 246.6<br>(972.3 - 1325.1)  | -                            |
|                          | <i>p</i> -value  | 0.693                               | -                            |
| Veg <sub>D</sub> (D1-D3) |                  | <b>&lt;0.001<sup>c</sup></b>        | -                            |
| Mix <sub>D</sub> (D1-D3) | <i>p</i> -value  | <b>0.002<sup>d</sup></b>            | -                            |

Values are expressed as means ( $\bar{X}$ ) ± SD and 95% CI. Veg<sub>D</sub> – Vegan Diet; Mix<sub>D</sub> – Mixed Diet; <sup>a</sup> C1 value is lower than C5 and C6, C2 is lower than C6; <sup>b</sup> C1 is lower than C6, C2 is lower than C6; <sup>c</sup> D1 is higher than D2 and D3, D2 is higher than D3; <sup>d</sup> D1 is higher than D3, D2 is higher than D3.
