# Supplementary material for: Effect of a Four-Week Vegan Diet on Performance, Training Efficiency and Blood Biochemical Indices in CrossFit-Trained Participants
Source: MDPI journal article supplement (doi:10.3390/nu14040894), 2022-02-20
Supplement: s1 [file s1]

Table S1. Minerals and vitamins intake in the customary and interventional diets

| Variable                           | Group            | Investigation period                                   |                                                       | <i>p</i> -value  |
|------------------------------------|------------------|--------------------------------------------------------|-------------------------------------------------------|------------------|
|                                    |                  | Before nutritional<br>interventional (T <sub>1</sub> ) | After nutritional<br>interventional (T <sub>2</sub> ) |                  |
|                                    |                  | $\bar{X} \pm \text{SD}$ (95% CI)                       | $\bar{X} \pm \text{SD}$ (95% CI)                      |                  |
| Sodium (mg·day <sup>-1</sup> )     | Veg <sub>D</sub> | 1983 ± 551<br>(1589 - 2378)                            | 1628 ± 117<br>(1545 - 1711)                           | 0.074            |
|                                    | Mix <sub>D</sub> | 1865 ± 534<br>(1483 - 2246)                            | 1496 ± 73<br>(1443 - 1548)                            | 0.093            |
|                                    | <i>p</i> -value  | 0.345                                                  | <b>0.011</b>                                          | -                |
| Potassium (mg·day <sup>-1</sup> )  | Veg <sub>D</sub> | 3387 ± 584<br>(2969 - 3805)                            | 5079 ± 865<br>(4461 - 5698)                           | <b>0.007</b>     |
|                                    | Mix <sub>D</sub> | 3592 ± 611<br>(3154 - 4029)                            | 5490 ± 791<br>(4924 - 6056)                           | <b>&lt;0.001</b> |
|                                    | <i>p</i> -value  | 0.453                                                  | 0.257                                                 | -                |
| Calcium (mg·day <sup>-1</sup> )    | Veg <sub>D</sub> | 998 ± 281<br>(797 - 1199)                              | 1669 ± 243<br>(1495 - 1843)                           | <b>0.001</b>     |
|                                    | Mix <sub>D</sub> | 864 ± 243<br>(690 - 1038)                              | 1109 ± 139<br>(1010 - 1208)                           | <b>0.005</b>     |
|                                    | <i>p</i> -value  | 0.269                                                  | <b>&lt;0.001</b>                                      | -                |
| Phosphorus (mg·day <sup>-1</sup> ) | Veg <sub>D</sub> | 2264 ± 475<br>(1924 - 2604)                            | 2408 ± 402<br>(2121 - 2695)                           | 0.074            |
|                                    | Mix <sub>D</sub> | 2424 ± 336<br>(2184 - 2665)                            | 2422 ± 410<br>(2128 - 2716)                           | 0.980            |
|                                    | <i>p</i> -value  | 0.396                                                  | 1.000                                                 | -                |
| Magnesium (mg·day <sup>-1</sup> )  | Veg <sub>D</sub> | 654 ± 138<br>(555 - 753)                               | 691 ± 125<br>(601 - 780)                              | 0.169            |
|                                    | Mix <sub>D</sub> | 735 ± 117<br>(651 - 818)                               | 715 ± 120<br>(629 - 800)                              | 0.488            |
|                                    | <i>p</i> -value  | 0.175                                                  | 0.257                                                 | -                |
| Iron (mg·day <sup>-1</sup> )       | Veg <sub>D</sub> | 15.8 ± 5.9<br>(11.6 - 20.0)                            | 27.1 ± 3.9<br>(24.3 - 29.9)                           | <b>0.005</b>     |
|                                    | Mix <sub>D</sub> | 17.4 ± 4.7<br>(14.0 - 20.8)                            | 19.3 ± 3.2<br>(17.0 - 21.6)                           | 0.176            |
|                                    | <i>p</i> -value  | 0.525                                                  | <b>0.001</b>                                          | -                |
| Zinc (mg·day <sup>-1</sup> )       | Veg <sub>D</sub> | 15.30 ± 3.88<br>(12.52 - 18.07)                        | 16.80 ± 2.59<br>(14.95 - 18.65)                       | <b>0.028</b>     |
|                                    | Mix <sub>D</sub> | 15.82 ± 2.65<br>(13.93 - 17.71)                        | 15.83 ± 2.84<br>(13.80 - 17.85)                       | 0.959            |
|                                    | <i>p</i> -value  | 0.791                                                  | 0.326                                                 | -                |
| Copper (mg·day <sup>-1</sup> )     | Veg <sub>D</sub> | 3.54 ± 1.02<br>(2.81 - 4.27)                           | 3.88 ± 0.51<br>(3.52 ± 4.24)                          | 0.139            |
|                                    | Mix <sub>D</sub> | 3.24 ± 0.54<br>(2.85 - 3.63)                           | 3.15 ± 0.49<br>(2.80 - 3.50)                          | 0.473            |
|                                    | <i>p</i> -value  | 0.414                                                  | <b>0.013</b>                                          | -                |
| Manganese (mg·day <sup>-1</sup> )  | Veg <sub>D</sub> | 88.06 ± 249.30<br>(-90.28 - 266.40)                    | 246.15 ± 380.48<br>(-26.04 - 518.33)                  | 0.093            |

|                                    |                  |                                  |                                  |                  |
|------------------------------------|------------------|----------------------------------|----------------------------------|------------------|
|                                    | Mix <sub>D</sub> | 8.25 ± 1.31<br>(7.31 - 9.18)     | 8.08 ± 1.27<br>(7.17 - 8.99)     | 0.575            |
|                                    | <i>p</i> -value  | 0.473                            | <b>0.001</b>                     | -                |
| Vitamin A (µg·day <sup>-1</sup> )  | Veg <sub>D</sub> | 1775 ± 560<br>(1374 - 2176)      | 1938 ± 265<br>(1749 - 2128)      | 0.799            |
|                                    | Mix <sub>D</sub> | 2071 ± 25<br>(2054 - 2089)       | 2311 ± 217<br>(2156 - 2466)      | <b>0.005</b>     |
|                                    | <i>p</i> -value  | 0.112                            | <b>0.034</b>                     | -                |
|                                    |                  |                                  |                                  |                  |
| Vitamin E (mg·day <sup>-1</sup> )  | Veg <sub>D</sub> | 11.46 ± 5.57<br>(7.48 - 15.44)   | 10.74 ± 8.23<br>(4.85 - 16.63)   | 0.285            |
|                                    | Mix <sub>D</sub> | 30.83 ± 2.72<br>(28.88 - 32.77)  | 29.53 ± 2.64<br>(27.64 - 31.42)  | <b>0.026</b>     |
|                                    | <i>p</i> -value  | <b>&lt;0.001</b>                 | <b>0.002</b>                     | -                |
|                                    |                  |                                  |                                  |                  |
| Thiamine (mg·day <sup>-1</sup> )   | Veg <sub>D</sub> | 2.603 ± 0.453<br>(2.279 - 2.927) | 3.068 ± 0.568<br>(2.662 - 3.474) | <b>0.013</b>     |
|                                    | Mix <sub>D</sub> | 2.881 ± 0.468<br>(2.546 - 3.216) | 3.254 ± 0.568<br>(2.848 - 3.660) | 0.145            |
|                                    | <i>p</i> -value  | 0.089                            | 0.257                            | -                |
|                                    |                  |                                  |                                  |                  |
| Riboflavin (mg·day <sup>-1</sup> ) | Veg <sub>D</sub> | 3.461 ± 0.938<br>(2.790 - 4.132) | 5.299 ± 0.887<br>(4.665 - 5.933) | <b>&lt;0.001</b> |
|                                    | Mix <sub>D</sub> | 2.463 ± 0.591<br>(2.040 - 2.886) | 2.828 ± 0.439<br>(2.514 - 3.142) | 0.112            |
|                                    | <i>p</i> -value  | <b>0.011</b>                     | <b>&lt;0.001</b>                 | -                |
|                                    |                  |                                  |                                  |                  |
| Niacin (mg·day <sup>-1</sup> )     | Veg <sub>D</sub> | 16.13 ± 2.74<br>(14.17 - 18.08)  | 18.79 ± 10.67<br>(11.15 - 26.42) | 0.646            |
|                                    | Mix <sub>D</sub> | 25.00 ± 7.18<br>(19.86 - 30.14)  | 38.89 ± 7.00<br>(33.89 - 43.90)  | <b>0.009</b>     |
|                                    | <i>p</i> -value  | <b>0.002</b>                     | <b>0.002</b>                     | -                |
|                                    |                  |                                  |                                  |                  |
| Pyridoxine (mg·day <sup>-1</sup> ) | Veg <sub>D</sub> | 2.32 ± 0.69<br>(1.83 - 2.81)     | 2.23 ± 1.30<br>(1.30 - 3.16)     | 0.093            |
|                                    | Mix <sub>D</sub> | 3.09 ± 1.02<br>(2.36 - 3.82)     | 4.77 ± 0.75<br>(4.23 - 5.30)     | <b>0.011</b>     |
|                                    | <i>p</i> -value  | <b>0.045</b>                     | <b>0.002</b>                     | -                |
|                                    |                  |                                  |                                  |                  |
| Vitamin C (mg·day <sup>-1</sup> )  | Veg <sub>D</sub> | 365.4 ± 55.7<br>(325.6 - 405.2)  | 326.0 ± 42.4<br>(295.7 - 356.4)  | <b>0.022</b>     |
|                                    | Mix <sub>D</sub> | 289.7 ± 8.7<br>(283.4 - 295.9)   | 289.1 ± 7.5<br>(283.8 - 294.5)   | 0.959            |
|                                    | <i>p</i> -value  | <b>0.026</b>                     | <b>0.010</b>                     | -                |
|                                    |                  |                                  |                                  |                  |

Values are expressed as means ( $\bar{X}$ ) ± SD and 95% CI. Veg<sub>D</sub> – Vegan Diet, Mix<sub>D</sub> – Mixed Diet.
